# Supplementary material for: Differential effects of RASA3 mutations on hematopoiesis are profoundly influenced by genetic background and molecular variant
Source: PLoS Genet. 2020 Dec 28;16(12):e1008857. doi: 10.1371/journal.pgen.1008857 (PMC7793307; doi:10.1371/journal.pgen.1008857)
Supplement: S8 Fig — Data for all mutants (combined cr and pr) vs. WT in (A) spleen and (B) bone marrow. David BP_FAT function. (DOCX) [file pgen.1008857.s008.docx]

**S8 Fig**

**B Bone Marrow**

**A Spleen**

**-LOG10Benjamini**

**-LOG10Benjamini**


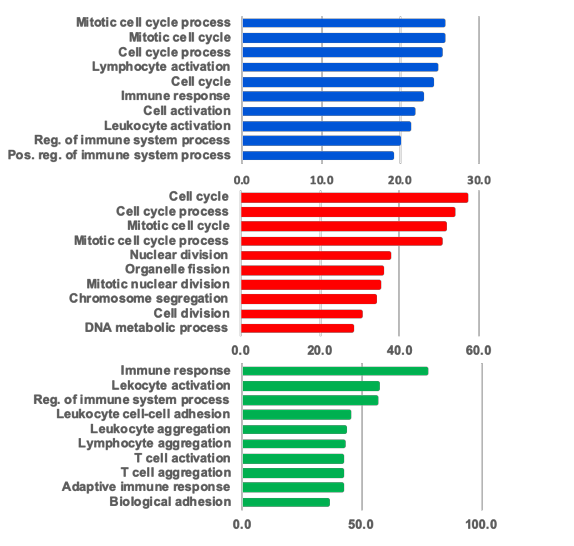

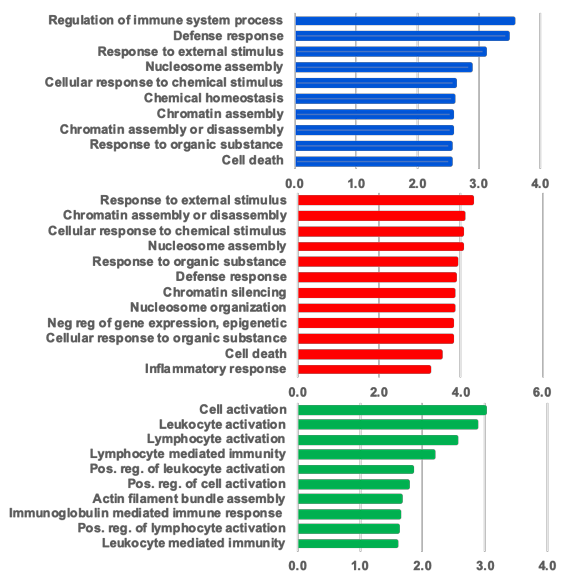


**Up in Mutant Down in Mutant**

**Top 3000 DEGs spleen)**

**ALL DEGs (BM)**
